# Supplementary material
Source: Springer Nature journal article supplement (https://www.springermedizin.de/resource/supplementary/12891_2012_1648_MOESM2_ESM.pdf/9508658)
Supplement: MOESM2 [file 9508658]

Have you been physically abused by an intimate partner?

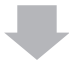

Have you been emotionally abused by an intimate partner?

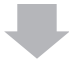

Have you been sexually abused by an intimate partner?
